# Supplementary material for: Effect of resistance training on muscle properties and function in women with generalized joint hypermobility: a single-blind pragmatic randomized controlled trial
Source: PubMed Central journal article supplement (PMC7871640; doi:10.1186/s13102-021-00238-8), 2021-02-08
Supplement: 13102_2021_238_MOESM3_ESM.pdf [file 13102_2021_238_MOESM3_ESM.pdf]

**Supporting Table T4.** Descriptive Data of Parameters from the Vertical Ground Reaction Force During Stair Ascent and Descent Before and After Training and for the Control Group as Mean Values (Standard Deviation) and the Respective Changes as Mean Difference and 95% Confidence Interval (CI)

|                           | Control Group (n = 24) |              |           |             |              | Training Group (n = 27) |              |           |             |              |
|---------------------------|------------------------|--------------|-----------|-------------|--------------|-------------------------|--------------|-----------|-------------|--------------|
|                           | Pre                    | Post         | Mean Diff | 95%CI Lower | 95% CI Upper | Pre                     | Post         | Mean Diff | 95%CI Lower | 95% CI Upper |
| Fmax Up [%bm]             | 109.2 (6.6)            | 108.9 (6.8)  | -0.3      | -1.6        | 1.0          | 108.9 (6.1)             | 107.8 (6.4)  | -1.0      | -2.4        | 0.4          |
| t to Fmax Up [ms]         | 200.3 (31.4)           | 199.1 (27.4) | -1.1      | -7.3        | 5.0          | 205.9 (29.8)            | 208.5 (24.4) | 2.5       | -6.0        | 11.1         |
| Loading Rate Up [%bm/s]   | 122.6 (50.2)           | 124.4 (44.9) | 1.8       | -4.2        | 7.8          | 113.9 (34.1)            | 111.1 (30.6) | -2.8      | -9.3        | 3.7          |
| Contact Time Up [ms]      | 734.5 (89.6)           | 726.6 (78.5) | -7.9      | -26.3       | 10.5         | 764.3 (85.1)            | 768.2 (73.9) | 3.9       | -20.6       | 28.5         |
| Fmax Down [%bm]           | 141.4 (13.7)           | 142.5 (12.5) | 1.1       | -2.8        | 8.0          | 140.0 (13.0)            | 141.5 (13.8) | 1.5       | -2.3        | 5.4          |
| t to Fmax Down [ms]       | 157.6 (20.5)           | 159.5 (17.7) | 1.9       | -3.9        | 7.6          | 169.7 (21.1)            | 168.2 (17.2) | -1.5      | -8.9        | 5.9          |
| Loading Rate Down [%bm/s] | 170.8 (54.9)           | 170.2 (53.2) | -0.7      | -9.5        | 8.2          | 154.0 (37.0)            | 153.3 (37.1) | -0.8      | -9.8        | 8.3          |
| Contact Time Down [ms]    | 701.4 (104.2)          | 694.4 (85.7) | -7.0      | -27.4       | 13.4         | 730.3 (84.0)            | 731.0 (65.1) | 0.9       | -26.4       | 27.7         |

diff = difference, Fmax = maximal force during weight acceptance, bm = body mass, t = time

**Supporting Table T5.** Descriptive Data of Maximal Muscle Activation Derived by Electromyography (EMG) During Stair Ascent and Descent Before and After Training and for the Control Group as Mean Values (Standard Deviation) and the Respective Changes as Mean Difference and 95% Confidence Interval (CI)

| EMG Muscle [% MVC]        | Control Group (n = 24) |             |           |             |              | Training Group (n = 27) |             |           |             |              |
|---------------------------|------------------------|-------------|-----------|-------------|--------------|-------------------------|-------------|-----------|-------------|--------------|
|                           | Pre                    | Post        | Mean Diff | 95%CI Lower | 95% CI Upper | Pre                     | Post        | Mean Diff | 95%CI Lower | 95% CI Upper |
| Biceps Femoris max up     | 16.6 (18.8)            | 17.9 (18.4) | 1.26      | -1.87       | 4.40         | 10.8 (9.2)              | 9.9 (7.9)   | -0.89     | -2.41       | 0.64         |
| Semitendinosus max up     | 17.5 (16.0)            | 17.6 (19.1) | 0.10      | -2.17       | 2.36         | 14.1 (11.3)             | 11.5 (9.9)  | -2.57     | -5.41       | 0.26         |
| Vastus Lateralis max up   | 44.8 (24.1)            | 47.8 (25.6) | 2.93      | -5.21       | 11.07        | 36.5 (19.2)             | 40.7 (24.6) | 4.21      | -2.34       | 10.75        |
| Vastus Medialis max up    | 45.2 (31.6)            | 45.5 (37.5) | 0.34      | -9.84       | 10.52        | 36.5 (20.1)             | 48.5 (35.7) | 11.95     | -0.43       | 24.32        |
| Biceps Femoris max down   | 9.7 (11.8)             | 7.7 (9.5)   | -1.93     | -3.29       | -0.57        | 5.4 (3.9)               | 4.6 (3.7)   | -0.76     | -1.99       | 0.47         |
| Semitendinosus max down   | 12.4 (13.6)            | 9.5 (10.4)  | -2.97     | -6.69       | 0.76         | 6.8 (6.0)               | 5.7 (6.0)   | -1.02     | -2.65       | 0.61         |
| Vastus Lateralis max down | 25.8 (17.6)            | 34.4 (30.3) | 8.55      | 1.46        | 15.64        | 20.0 (9.6)              | 21.4 (17.6) | 1.49      | -2.56       | 5.55         |
| Vastus Medialis max down  | 25.9 (16.9)            | 29.0 (25.1) | 3.08      | -2.12       | 8.27         | 20.3 (10.6)             | 27.8 (12.3) | 7.56      | 0.83        | 14.24        |

MVC = maximal voluntary contraction

**Supporting Table T6.** Descriptive Data for the Eight Dimensions of the SF-36 Before and After training and for the Control Group as Mean Values (Standard Deviation) and the Respective Changes, as Mean Difference and 95% Confidence Interval (CI)

| Dimension of SF-36          | Control Group (n = 24) |             |           |              |              | Training Group (n = 27) |             |           |              |              |
|-----------------------------|------------------------|-------------|-----------|--------------|--------------|-------------------------|-------------|-----------|--------------|--------------|
|                             | Pre                    | Post        | Mean Diff | 95% CI Lower | 95% CI Upper | Pre                     | Post        | Mean Diff | 95% CI Lower | 95% CI Upper |
| Physical Functioning        | 95.0 (11.3)            | 94.8 (10.1) | -0.21     | -1.37        | 0.95         | 94.1 (9.9)              | 91.5 (12.0) | -2.59     | -4.74        | -0.44        |
| Physical Role Functioning   | 89.6 (25.5)            | 91.7 (25.2) | 2.08      | -2.23        | 6.39         | 90.1 (24.5)             | 87.0 (27.2) | -3.09     | -9.99        | 3.83         |
| Bodily Pain                 | 84.8 (24.2)            | 83.1 (20.0) | -1.67     | -8.97        | 5.63         | 75.3 (18.2)             | 77.1 (20.4) | 1.74      | -3.76        | 7.25         |
| General Health Perception   | 79.8 (16.4)            | 82.5 (13.5) | 2.63      | -1.32        | 6.57         | 75.9 (22.5)             | 74.1 (23.3) | -1.85     | -4.56        | 0.85         |
| Vitality                    | 58.8 (19.1)            | 60.0 (17.4) | 1.25      | -3.12        | 5.62         | 53.2 (21.0)             | 54.3 (22.0) | 1.05      | -3.52        | 5.62         |
| Social Role Functioning     | 87.0 (16.3)            | 90.1 (13.3) | 3.13      | 0.32         | 5.93         | 93.1 (13.6)             | 92.6 (15.2) | -0.46     | -5.86        | 4.93         |
| Emotional Role Functioning  | 90.3 (20.1)            | 95.8 (15.0) | 5.56      | -1.22        | 12.33        | 95.1 (12.1)             | 84.0 (26.8) | -11.11    | -22.68       | 0.45         |
| Mental Health               | 73.5 (17.4)            | 76.5 (14.7) | 3.00      | -1.52        | 7.52         | 73.3 (20.8)             | 75.4 (19.2) | 2.11      | -3.31        | 7.54         |
| Physical Health (sum score) | 54.6 (7.3)             | 54.2 (7.1)  | -0.41     | -1.93        | 1.11         | 52.3 (7.1)              | 52.0 (7.9)  | -0.36     | -2.04        | 1.31         |
| Mental Health (sum score)   | 49.2 (8.7)             | 51.2 (8.1)  | 2.05      | -0.01        | 4.11         | 51.3 (6.8)              | 50.8 (8.2)  | -0.54     | -3.95        | 2.87         |

Scoring for individual dimensions is 0-100 with lower scores indicating poorer health, for the sum scores 50 is equivalent to the US-norm population values.

**Supporting Table T7.** Descriptive Data for the Dimensions of the AIMS-2 and the Hypermobility Questionnaire Before and After training and for the Control Group as Mean Values (Standard Deviation) and the Respective Changes, as Mean Difference and 95% Confidence Interval (CI)

| Dimensions of AIMS-2 | Control Group (n = 24) |            |           |             |              | Training Group (n = 27) |            |           |             |              |
|----------------------|------------------------|------------|-----------|-------------|--------------|-------------------------|------------|-----------|-------------|--------------|
|                      | Pre                    | Post       | Mean Diff | 95%CI Lower | 95% CI Upper | Pre                     | Post       | Mean Diff | 95%CI Lower | 95% CI Upper |
| Walking, Bending     | 0.4 (0.8)              | 0.5 (1.2)  | 0.04      | -0.23       | 0.31         | 0.6 (0.8)               | 0.8 (1.7)  | 0.19      | -0.50       | 0.87         |
| Social Activity      | 4.4 (1.3)              | 4.2 (1.4)  | -0.20     | -0.62       | 0.22         | 4.3 (2.0)               | 3.8 (2.0)  | -0.48     | -0.97       | 0.01         |
| Pain                 | 1.3 (1.8)              | 1.3 (1.7)  | 0.00      | -0.27       | 0.27         | 1.7 (1.9)               | 1.3 (1.7)  | -0.39     | -0.75       | -0.03        |
| Level of Tension     | 3.4 (1.8)              | 3.3 (1.4)  | -0.06     | -0.70       | 0.57         | 3.5 (1.3)               | 3.4 (1.7)  | -0.09     | -0.62       | 0.43         |
| Satisfaction         | 0.9 (1.5)              | 0.7 (0.7)  | -0.24     | -0.72       | 0.25         | 0.9 (1.4)               | 1.1 (1.2)  | 0.16      | -0.14       | 0.46         |
| Health Perceptions   | 2.6 (2.2)              | 2.6 (2.0)  | 0.00      | -0.72       | 0.72         | 3.1 (2.3)               | 3.1 (2.1)  | 0.00      | -0.64       | 0.64         |
| Impact               | 1.9 (1.9)              | 2.0 (2.2)  | 0.12      | -0.55       | 0.79         | 2.1 (2.4)               | 2.1 (2.4)  | 0.00      | -0.48       | 0.48         |
| Physical Component   | 0.3 (0.7)              | 0.2 (0.5)  | -0.06     | -0.18       | 0.06         | 0.2 (0.3)               | 0.2 (0.4)  | 0.02      | -0.10       | 0.13         |
| Affect               | 2.7 (1.6)              | 2.6 (1.3)  | -0.07     | -0.65       | 0.50         | 2.8 (1.2)               | 2.8 (1.4)  | 0.04      | -0.32       | 0.40         |
| Social Interaction   | 3.2 (1.0)              | 3.2 (1.1)  | 0.01      | -0.36       | 0.37         | 3.1 (1.3)               | 3.0 (1.1)  | -0.17     | -0.42       | 0.09         |
| HM-Q (sum score)     | 29.0 (8.6)             | 27.1 (7.0) | -1.82     | -3.73       | 0.08         | 32.6 (10.9)             | 31.1 (7.9) | -1.59     | -3.82       | 0.64         |

AIMS-2 = Arthritis impact measurement scales 2 (scale 0-10, lower scores indicating better health), HM-Q = Hypermobility questionnaire (scale 20-100, with lower values indicating better health)
